# Supplementary material
Source: PubMed Central journal article supplement (PMC3388159)

# Supplemental figure 2

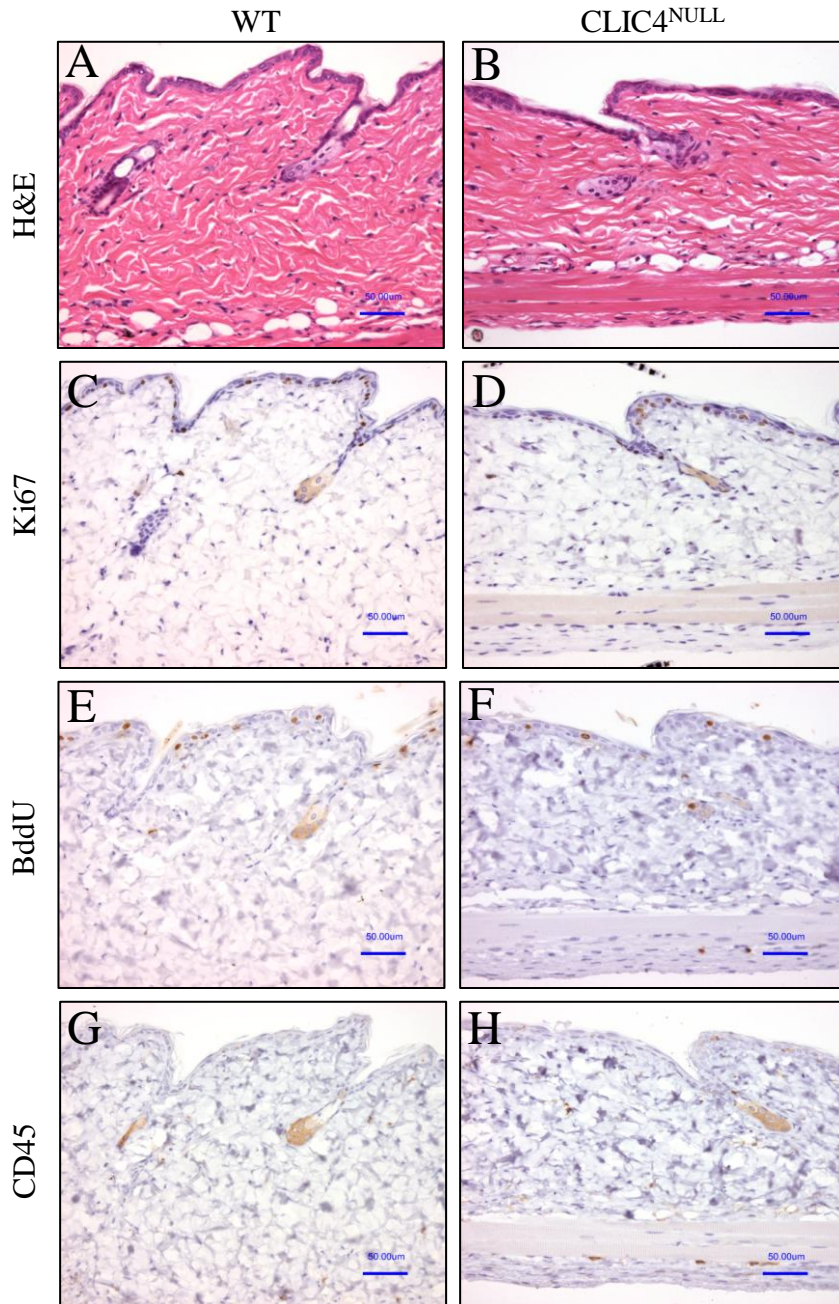

Supplement: mmc2.pdf [file mmc2.pdf]

# Supplemental figure 3

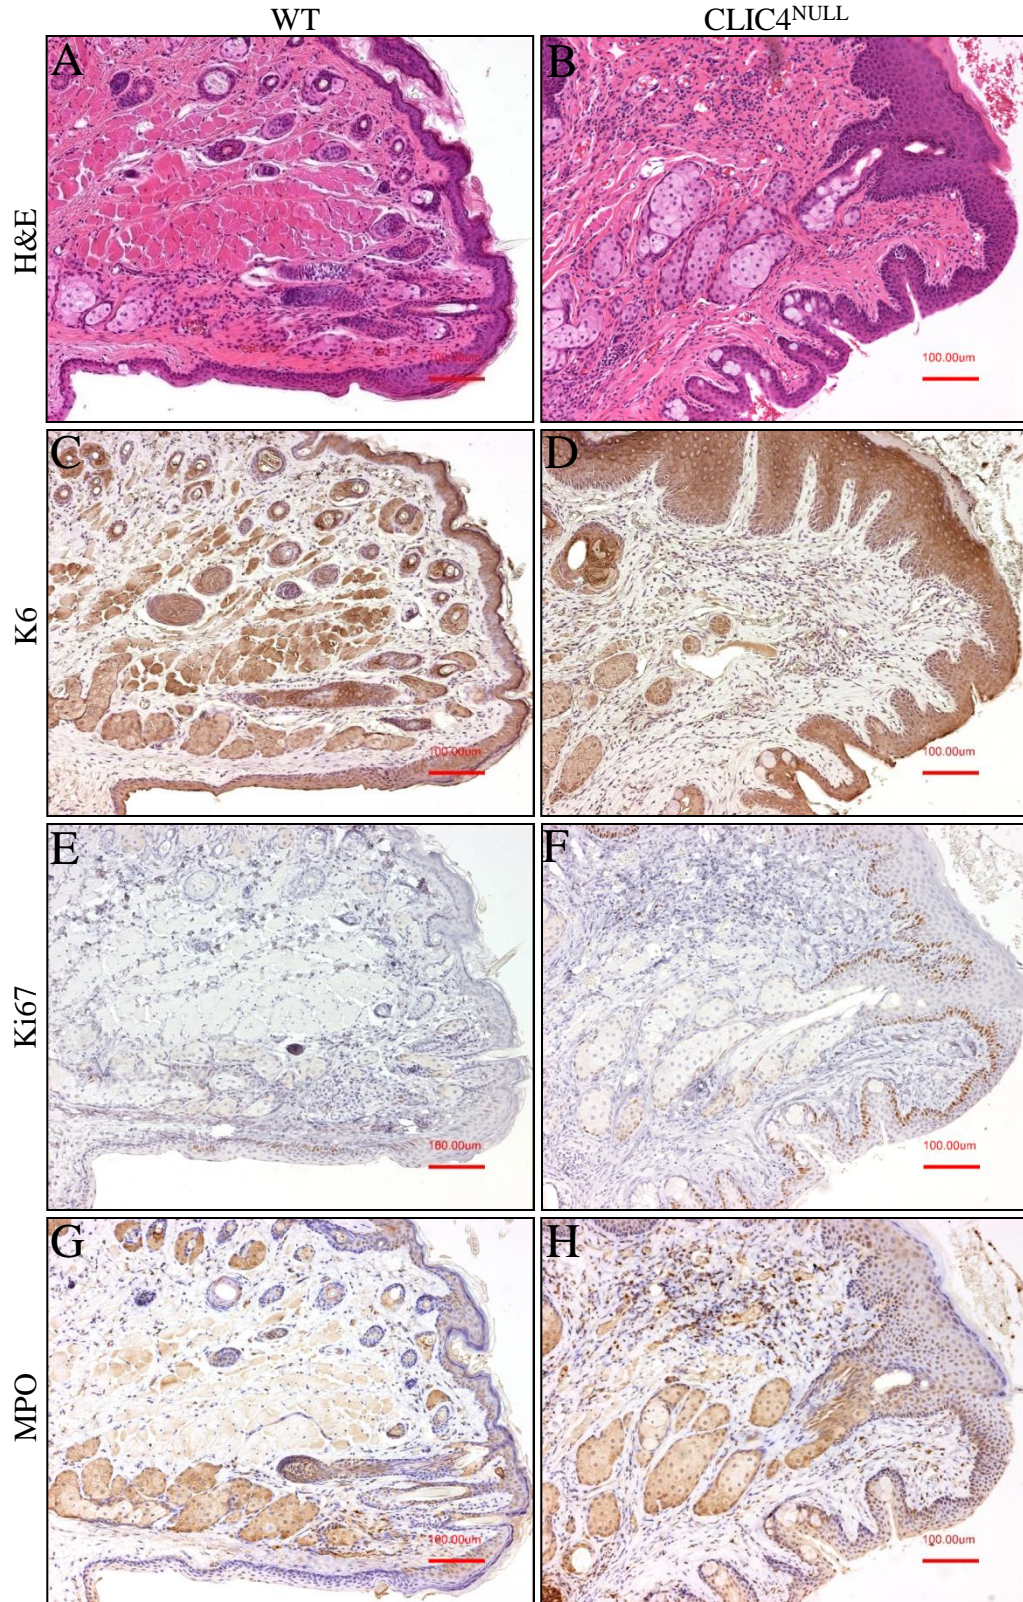

Supplement: mmc3.pdf [file mmc3.pdf]

# Supplemental Figure 5

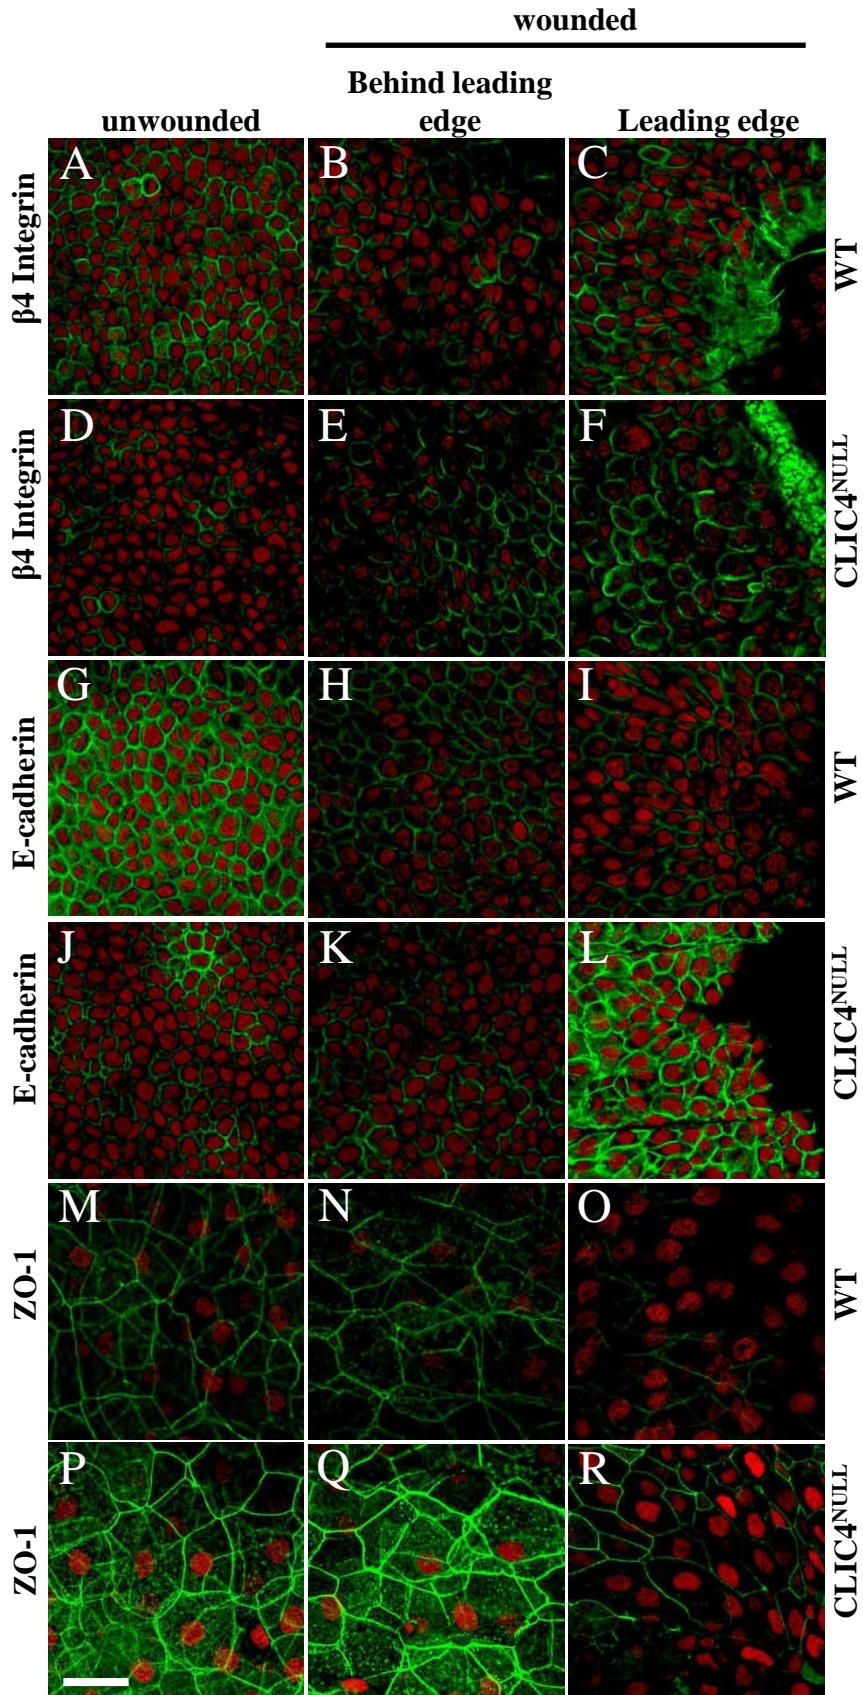

Supplement: mmc5.pdf [file mmc5.pdf]
